# 1           **Composition and acquisition of the microbiome in solitary, ground-nesting alkali bees**

2  
3                           Karen M. Kapheim<sup>\*1</sup>, Makenna M. Johnson<sup>1</sup>, Maggi Jolley<sup>1</sup>

4                           <sup>1</sup>Department of Biology, Utah State University, Logan, UT 84322, USA

5  
6   \* Corresponding author: [karen.kapheim@usu.edu](mailto:karen.kapheim@usu.edu)

## 7 8   **ABSTRACT**

9   Increasing evidence suggests the microbiome plays an important role in bee ecology and health. However,  
10 the relationship between bees and their bacterial symbionts has only been explored in a handful of  
11 species. We characterized the microbiome across the life cycle of solitary, ground-nesting alkali bees  
12 (*Nomia melanderi*). We find that feeding status is a major determinant of microbiome composition. The  
13 microbiome of feeding larvae was similar to that of pollen provisions, but the microbiome of post-feeding  
14 larvae (pre-pupae) was similar to that of the brood cell walls and newly-emerged females. Feeding larvae  
15 and pollen provisions had the lowest beta diversity, suggesting the composition of larval diet is highly  
16 uniform. Comparisons between lab-reared, newly-emerged, and nesting adult females suggest that the  
17 hindgut bacterial community is largely shaped by the external environment. However, we also identified  
18 taxa that are likely acquired in the nest or which increase or decrease in relative abundance with age.  
19 Although *Lactobacillus micheneri* was highly prevalent in pollen provisions, it was only detected in one  
20 lab-reared female, suggesting it is primarily acquired from environmental sources. These results provide  
21 the foundation for future research on metagenomic function and development of probiotics for these  
22 native pollinators.

## 23 24   **INTRODUCTION**

25   Communities of bacterial symbionts play an important role in animal biology, but the factors that shape  
26 the composition and acquisition of the microbiome are known for relatively few species. Rapid

27 advancement in microbiome research has demonstrated that bacterial symbionts can influence host  
28 nutrition<sup>1-3</sup>, immunity<sup>3-5</sup>, and behavior<sup>6-8</sup>. Thus, understanding the health, physiology, or evolutionary  
29 ecology<sup>9</sup> of any given animal species is incomplete without knowledge of their associated microbes. Two  
30 important aspects of this relationship are (1) the composition of the bacterial community throughout the  
31 host lifecycle and (2) the factors that determine how this community is acquired and maintained<sup>10</sup>.  
32 Despite a rapid advancement in microbiome research, knowledge of the relationship between animals and  
33 their bacterial associates is limited to a relatively small proportion of host species, especially among bees.  
34  
35 Understanding bee-microbiome relationships is particularly important, because bees are critical  
36 pollinators in both agricultural and natural communities. There is accumulating evidence that the  
37 microbiome influences several aspects of pollinator health<sup>11,12</sup>. For example, the microbiome affects  
38 nutritional intake by regulating appetitive behavior<sup>13</sup>, aiding in digestion<sup>12,14-16</sup>, or preventing spoilage of  
39 provisions<sup>17</sup>. An intact microbiome can also protect bees against toxins<sup>18,19</sup>, pesticides<sup>19</sup>, pathogens<sup>20-23</sup>,  
40 and parasites<sup>24-26</sup>, presumably in part by activating the host immune system<sup>5,27,28</sup>. Most of these findings  
41 stem from research with honey bees and bumble bees. It is unknown if similar protective effects of the  
42 microbiome are conferred to host solitary bees, partly because many wild bees lack a strongly  
43 characteristic core microbiome<sup>29-36</sup>. Thus, understanding pollinator health as it pertains to the microbiome  
44 requires knowledge of the factors that shape the composition and acquisition of the microbiome in a  
45 diverse set of bee species.  
46  
47 The factors that contribute to microbiome diversity are highly variable. Bee microbiome composition can  
48 be influenced by the evolutionary history<sup>37,38</sup> and ecology<sup>39-41</sup> of the host species, as well as intraspecific  
49 variation stemming from differences in caste<sup>42-44</sup>, development stage<sup>34,45</sup>, diet<sup>46-48</sup>, and infection status<sup>49</sup>.  
50 Research with additional bee species is likely to yield further insights into inter- and intra-specific  
51 variation in the microbiome. For example, most of the >20,000 described species of bees are solitary, nest  
52 underground, and diapause as larvae<sup>50-52</sup>. Yet, none of the bees for which the microbiome has been

53 studied fit this ecological niche. Here we fill this gap with a study of the composition and acquisition of  
54 the solitary alkali bee (*Nomia melanderi*), which is an important native pollinator in the western U.S.  
55  
56 Alkali bees are solitary, ground-nesting bees native to semi-arid regions of the western U.S. In some parts  
57 of their range, alkali bees are managed for alfalfa seed pollination, where they are encouraged to nest in  
58 moist soil beds sealed with salted surfaces<sup>53</sup>. This management practice results in some of the largest  
59 aggregations of bee nests ever recorded (up to 5.3 million) and gives alkali bees the unique distinction as  
60 the world's only managed ground-nesting bee<sup>54</sup>. Although they are highly effective alfalfa pollinators,  
61 alkali bees are floral generalists throughout their range<sup>55</sup>. Some of the threats they face include microbial  
62 spoilage of brood provisions<sup>53,56</sup>, viral infections<sup>57</sup>, larval predators<sup>58,59</sup>, cleptoparasites<sup>53,59</sup>, vertebrate  
63 predators<sup>53</sup>, collisions with automobiles<sup>53</sup>, and pesticide exposure<sup>60</sup>. Although some managed nesting  
64 aggregations have persisted for over 60 years, they are subject to extreme fluctuations in population size.  
65 Historical records of the current study population suggest there have been repeated population crashes  
66 followed by rapid and sustained growth<sup>53,54,61</sup>, and population genetic analyses suggest effective  
67 population size has declined in the recent past<sup>62</sup>. Alkali bees are facultatively multivoltine throughout  
68 their range, but univoltine in the current study population. Mating occurs in the spring or early summer,  
69 when males and females who have overwintered as pre-pupae complete diapause and emerge from their  
70 natal nests<sup>53,63,64</sup>. Females excavate a nest tunnel and begin provisioning brood cells within a few days of  
71 emergence. Each female provisions 9-16 brood cells within a 4-6 week adult lifespan<sup>53</sup>. We characterized  
72 the community of bacterial associates of alkali bees throughout their lifecycle (Fig. 1), and experimentally  
73 investigated how the adult female microbiome is acquired by identifying bacterial taxa that are  
74 differentially abundant in newly-emerged, lab-reared, and wild nesting bees. Our results provide an  
75 important reference point in understanding the relationship between bees and their microbial symbionts.

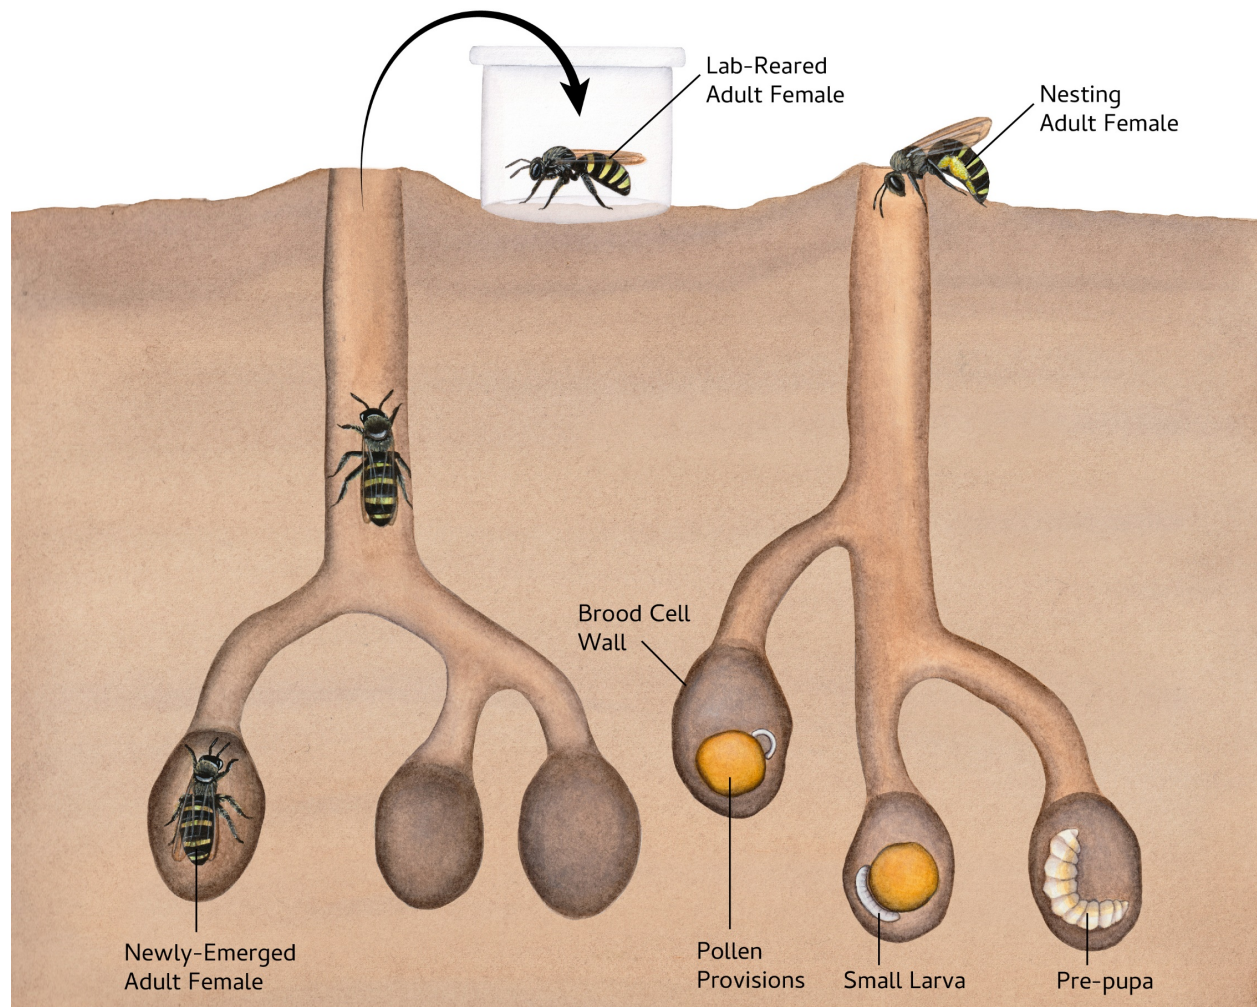

76

77 **Fig. 1.** Experimental overview. We sampled adult females as they emerged from their nests after  
78 completing development in early summer. Some of these adult females were frozen immediately (newly-  
79 emerged) and others were reared in the lab for 10 d (lab-reared). We also sampled adult females that were  
80 free-flying and actively nesting (nesting females). We excavated nests to collect brood cell walls, pollen  
81 provisions, small larvae, and pre-pupae. Illustration by Julie Johnson (Life Science Studios).

82

## 83 **METHODS**

### 84 *Bee Collections*

85 Alkali bees (*Nomia melanderi*) were collected in June-July 2016 in Touchet, WA, USA. In Touchet,  
86 alfalfa seed growers maintain large beds of soil (called “bee beds”) that attract alkali bee nesting at very  
87 high densities<sup>54</sup>. We excavated nests in bee beds to collect uneaten pollen provisions from under eggs,

88 small feeding larvae, pre-pupae (post-feeding larvae), and portions of the brood cell walls, which are lined  
89 with hydrophobic secretions in halictid bees. We used gloves and cleaned our tools with 10% bleach  
90 between each sample. Samples were transferred to clean 1.8 ml centrifuge tubes while in the field and  
91 frozen in liquid nitrogen within one hour of collection.

92

93 Adult females were the same as those used in a prior study<sup>65</sup>. We collected nesting females in nets  
94 returning to their nests with pollen on their legs, which indicates they were actively provisioning brood  
95 cells. Newly-emerged females were collected in emergence traps as they emerged from winter  
96 hibernation, following previously described methods<sup>65</sup>. Adult females were transferred to the lab in  
97 coolers and then either frozen in liquid nitrogen (newly-emerged and nesting females) or reared in the lab  
98 for 10 d under experimental conditions. Lab-reared females were randomly assigned to a diet treatment:  
99 sugar water only (sterile 35% sucrose solution), sugar water with pollen (2.5 g sterile, finely ground,  
100 honey bee pollen in 20 ml of sterile 35% sucrose solution), and sugar water with pollen plus four sprigs of  
101 fresh, un-tripped alfalfa flowers collected from fields adjacent to bee beds. Gamma-irradiated honey bee  
102 pollen was purchased from Better Bee. We pre-made individual 2.5 g packets of pollen with an additional  
103 round of sterilization via ethylene oxide (Anprolene AN74i), which were then vacuum sealed and frozen  
104 until use. Sterilization was confirmed by a lack of bacterial growth after plating and incubating a  
105 subsample of the sterilized pollen for > 72 hours. Sucrose solution was sterilized through a 0.2 micron  
106 filter following previous studies<sup>66-68</sup>. The pollen-sugar mixture was homogenized before each feeding and  
107 then pipetted into feeders. Fresh diet was prepared and feeders were cleaned with 10% bleach daily. Bees  
108 were maintained in plastic cages (72 mm x 90-113 mm) under full spectrum lighting (13 h light: 11 h  
109 dark) at 22-28 °C and 40-85% relative humidity. Cages were cleaned with 10% bleach prior to use. Upon  
110 collection, all samples were stored in liquid (or dry for shipping) nitrogen until return to Utah State  
111 University, where they were stored at -80 °C until dissection. Dissections followed previously reported  
112 methods<sup>69</sup>.

113

114 Importantly, the newly-emerged and lab-reared adult females were not “germ-free”. Each had some  
115 exposure to environmental sources of bacteria, but these differed from those of the freely nesting females,  
116 whom were actively foraging and were thus exposed to flowers and other elements of the landscape.  
117 Newly-emerged bees overwintered and completed development in the underground nests that they  
118 emerged from at the time of collection. They were thus exposed to bacteria present in the brood cell or  
119 nest tunnel and potentially to siblings who completed development at the same time. However, they did  
120 not have any exposure to the external environment (e.g., flowers), and they were prevented from  
121 interacting with other bees that had environmental exposure, because the traps prevented entry from the  
122 outside. Additionally, we aimed to eliminate bacterial inoculation from floral resources by pre-sterilizing  
123 the pollen and sucrose solution provided to lab-reared bees, but the lab conditions were not themselves  
124 sterile. Thus, the lab-reared females were exposed to bacteria present in the lab, but were deprived of the  
125 type of environmental exposure adult bees experience under normal, nesting conditions (e.g., flowers).

126

### 127 *DNA Extraction*

128 We extracted DNA from each sample using MoBio PowerSoil kits, following manufacturers protocol, but  
129 with the addition of a 10 min incubation at 95 °C immediately following the addition of C1 solution.  
130 Working areas were cleaned with 10% bleach prior to extraction, and tools were flame sterilized between  
131 each sample. We extracted DNA from the hindguts of adult females following dissection. Larvae and pre-  
132 pupae were surface sterilized in a 1% bleach solution, followed by 3 rinses in sterile water. For larvae and  
133 pre-pupae, a 2 mm<sup>3</sup> section was excised from the posterior end for DNA extraction. For pollen provisions,  
134 a 2 mm<sup>3</sup> piece was excised from the center of the provision. We included a blank in each batch of  
135 extractions to control for contamination. These 12 blanks were included in the library preparation,  
136 sequencing, and sequence processing. DNA was eluded in 100 µl of C6 buffer, and yield was quantified  
137 with a Qubit HS DNA assay.

138

139 ***Sequencing***

140 The V4 region of the 16S rRNA gene was amplified on a Fluidigm Access Array for amplicon  
141 sequencing. We used the primers 515F (5'-GTGYCAGCMGCCGCGGTAA) and 806R (5'-  
142 GGACTACNVGGGTWTCTAAT). The resulting library was quantified by qPCR and sequenced on one  
143 MiSeq flowcell for 251 cycles from each end of the fragments using a MiSeq 500-cycle sequencing kit  
144 (v2). Fastq files were generated and demultiplexed with the bcl2fastq (v2.17.1.14) conversion software  
145 (Illumina). This generated a total of 20,024,886 reads from 84 experimental samples, with a mean  $\pm$   
146 standard error of  $238,391.50 \pm 27,122.47$  reads per sample. Library preparation and sequencing were  
147 performed by the Keck Center for Comparative and Functional Genomics in the University of Illinois  
148 Biotechnology Center.

149

150 ***Sequence Processing***

151 After visually inspecting the distribution of quality scores, we processed the 16S rRNA sequences in the  
152 QIIME2 (v2019.4) environment. We used cutadapt to trim any remaining adapters. We then used  
153 DADA2 to join denoise and deuplicate sequences, including the removal of chimeric sequences, singleton  
154 reads, quality filtering and joining of paired ends. We truncated forward reads at 213 nts and reverse reads  
155 at 191 nts, based on the location at which median quality score dropped below 30. We classified the  
156 resulting amplicon sequence variants (ASVs) with the SILVA 16S rRNA database (v132), using the 7  
157 level taxonomy file and 99% identity. We extracted reference reads based on our 515F/806R primer pairs  
158 and length 100-400 nts. We then classified the ASVs with 'classify-sklearn'. We aligned sequences with  
159 MAFFT and then generated a rooted phylogenetic tree FastTree using align-to-tree-mafft-fasttree. We  
160 then removed ASVs classified as mitochondria or chloroplast. We visualized rarefaction curves with  
161 'alpha-rarefaction'. Code is available at <https://github.com/kapheimlab>.

162

163 ***Statistical Analysis***

164 We performed statistical analysis of bee microbiomes in R v.3.6.2 <sup>70</sup>, using the phyloseq v.1.28.0 tool <sup>71</sup>.

165 R code is available at <https://github.com/kapheimlab>. Two potential contaminants were identified and

166 removed from the feature table with decontam v.1.4.0 <sup>72</sup>, based on a criteria of being prevalent in more

167 negative controls than real samples. We also identified two taxa that were detected in one negative control

168 and one or more samples. This could be the result of tag-jumping, so we removed these taxa from samples

169 for which the abundance was more than twice as high as it was in the negative control. This resulted in

170 removal of one taxa from 9 samples. No samples met this criterion for the second taxa. We removed

171 ASVs that were not assigned to a Phylum and which were not seen at least 25 times in at least 2 samples

172 from the entire dataset. We also removed samples with fewer than 400 reads. Of the seven lab-reared

173 females remaining in the dataset, two were fed only sugar water, four were fed sugar water with pollen,

174 and one was given sugar water with pollen and fresh alfalfa sprigs. We removed the one lab-reared female

175 given alfalfa. We then visually (Principal Coordinates Analysis [PCoA]) and statistically (adonis2 in

176 Vegan<sup>73</sup>) investigated differences in the microbiome of lab-reared females given sugar or sugar and

177 pollen. These two groups did not significantly differ ( $F = 1.33$ , d.f. = 1,  $p = 0.47$ ; Fig. S1). We, therefore,

178 collapsed these two sample types into a single ‘lab-reared’ category for all further analyses. Our final

179 phyloseq object included 1,334 taxa and 62 samples. We rarefied to an even depth of 486 reads. Given the

180 ongoing debate about the value of rarefaction<sup>74</sup>, we employed more than one normalization method where

181 appropriate.

182

183 We visualized overall differences in microbial communities across sample types with Principal

184 Coordinates Analysis (PCoA) applied to Bray-Curtis and weighted UniFrac distance matrices of log-

185 transformed abundance data. We clustered samples with average linkage applied to a Bray-Curtis distance

186 matrix of relative abundances. We tested for overall differences among sample types with adonis2 based

187 on a Bray-Curtis distance matrix of relative abundances. We stratified 9,999 permutations across bee bed

188 of origin. We followed this with pairwise comparisons using 9,999 permutation MANOVAs and a



189 Benjamini-Hochberg (BH) correction of p-values. We tested for differences in beta diversity with  
190 betadisper in vegan followed by pairwise comparisons with the Tukey Honest Significant Difference  
191 method (TukeyHSD)<sup>75</sup>.

192  
193 We estimated the Shannon diversity index using a non-filtered dataset with the estimate\_richness function  
194 in vegan. We tested for significant differences in square-root transformed Shannon indexes among sample  
195 types with a mixed effects model that included bee bed of origin as a random effect in the package lme4<sup>76</sup>.  
196 We used emmeans<sup>77</sup> for pairwise comparisons with p-values adjusted by the Tukey method.

197  
198 We used DESeq2<sup>78</sup> to identify taxa that were differentially abundant across sample types. We included all  
199 sample types and bee bed of origin in the initial DESeq analysis, but then used pairwise contrasts to  
200 identify ASVs with differences in abundance that were significantly different at a BH-adjusted p-value <  
201 0.05 between each type of adult female. Pearson's correlations were measured between relative  
202 abundance of each ASV and metrics of reproductive physiology, including Dufour's gland length,  
203 maximum terminal oocyte length, and maximum stage of oogenesis among adult females, using the  
204 associate wrapper in the microbiome package v.1.6.0<sup>79</sup>. We created a phylogenetic tree of ASVs classified  
205 as *Lactobacillus micheneri* with the function 'plot\_tree'.

206

## 207 **RESULTS**

### 208 ***Overall differences in microbiome***

209 We identified significant differences in the overall microbial communities among sample types. PCoA  
210 revealed clustering among sample types (Fig. 2A). Specifically, Dimension 1 explained 22.9% of the  
211 variance in log-transformed microbiome composition and almost completely separated brood cell walls,  
212 pre-pupae, newly emerged females, and lab-reared females from pollen provisions, small larvae, and  
213 nesting females. This separation was also evident, though to a lesser degree, when the PCoA was based  
214 on a weighted unifracs distance matrix (Fig. S2) and in a dendrogram based on average-linkage of relative

215 abundances (Fig. S3). Most sample types were dominant by bacteria from the phylum Proteobacteria, but  
216 the microbiome of pollen provisions and small larvae were comprised primarily of Firmicutes (Fig. 2B).  
217  
218 A permutation test revealed significant differences in the microbiome profiles among sample types ( $F =$   
219  $5.356$ , d.f. = 6,  $p = 1e-04$ ). Pairwise comparisons revealed significant differences (BH-adjusted  $p < 0.05$ )  
220 between all samples types except lab-reared vs. newly-emerged females ( $p = 0.076$ ), pre-pupae vs. newly-  
221 emerged females ( $p = 0.052$ ), and small larvae vs. pollen provisions ( $p = 0.135$ ). Overall and pairwise  
222 results were consistent when this analysis was repeated on rarefied data ( $F = 5.537$ , d.f. = 6,  $p = 0.0001$ ).  
223

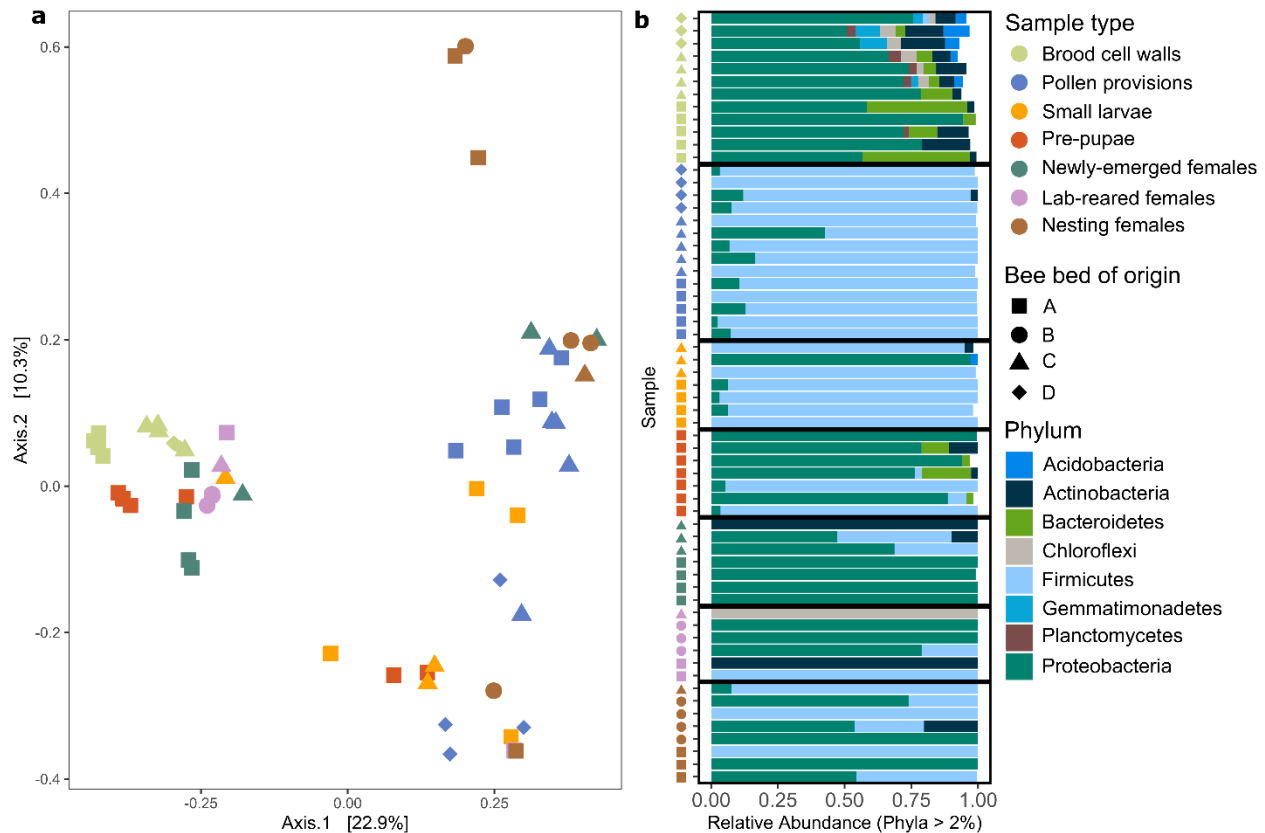

224

225 **Fig. 2.** Microbiome composition across the alkali bee life cycle. (a) Principal Coordinates Analysis (PCoA)  
226 plot of Bray-Curtis dissimilarity from log-transformed abundances. Each point represents the bacterial  
227 community of an individual sample. (b) Relative abundance of Phyla found at greater than 2% abundance  
228 in each sample. Each row represents the bacterial community of an individual sample. Colors indicate  
229 sample type and shapes indicate bee bed from which sample was collected.

230

231 ***Differences in diversity across sample types***

232 There were significant differences in beta diversity, as measured by multivariate dispersion, among  
233 sample types ( $F = 6.444$ , d.f. = 6,  $p = 3.637e-05$ ). Brood cell walls and adult females had the highest  
234 dispersion, while pollen provisions and small larvae had the lowest (Fig. 3A). Brood cell walls, newly-  
235 emerged females, and lab-reared females had significantly higher dispersion than pollen provisions and  
236 small larvae. No other groups had significant differences in dispersion. Overall and pairwise results were  
237 consistent when this analysis was repeated on rarefied data ( $F = 6.741$ , d.f. = 6,  $p = 2.281e-05$ ).

238

239 There were also significant differences in alpha diversity, as measured with the Shannon index, across  
240 sample types ( $F = 25.352$ , d.f. = 6,  $p < 3.415e-16$ ; Fig. 3B). Brood cell walls had a significantly higher  
241 Shannon index than all other samples types ( $p < 0.003$ ). Pre-pupae had a significantly higher Shannon  
242 index than lab-reared females ( $p = 0.006$ ). These results were also consistent when the analysis was  
243 repeated on rarefied data ( $F = 28.856$ , d.f. = 6,  $p < 2.2e-16$ ). However, in the latter case, pre-pupae also  
244 had a significantly higher Shannon index than small larvae ( $p = 0.03$ ) and pollen provisions ( $p = 0.001$ ).

245

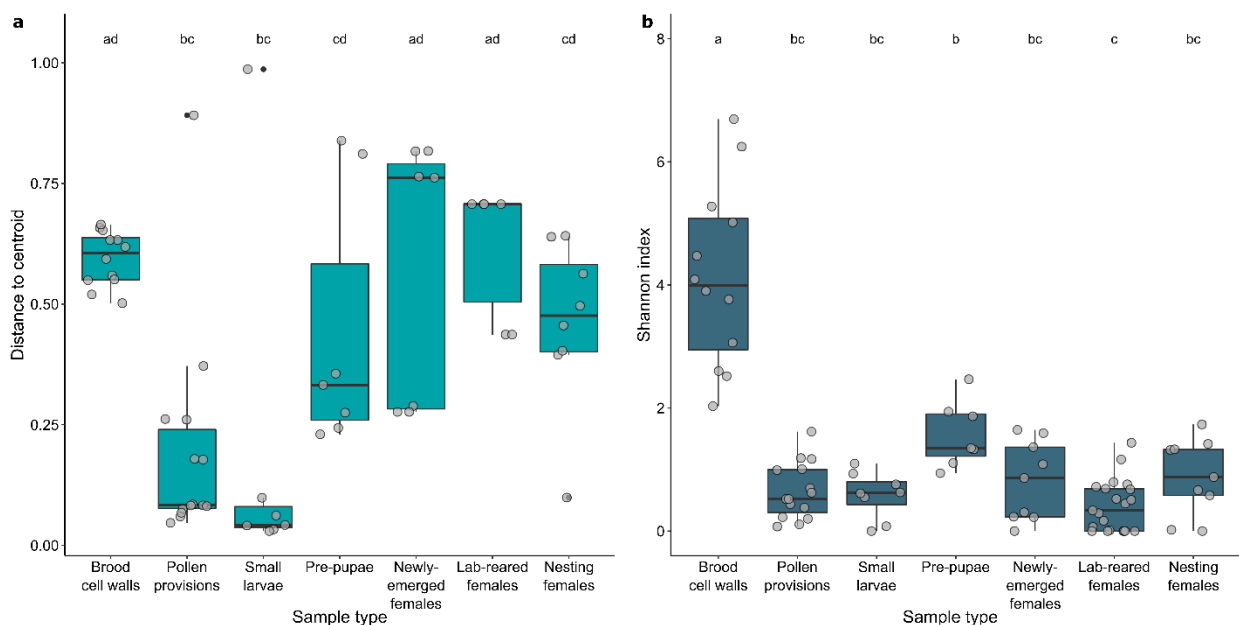

246

247 **Fig. 3.** Bacterial diversity across sample types. (a) Multivariate dispersion displayed as distance from the  
248 centroid. (b) Alpha diversity calculated as Shannon index. Boxes represent the interquartile range, with a  
249 line indicating the median. Different letters along the top indicate significant (Tukey adjusted  $p < 0.05$ )  
250 differences between sample types. Whiskers extend to 1.5 times the interquartile values. Gray filled circles  
251 represent data from individual samples. There are more samples in (b), because unfiltered data was used  
252 to calculate Shannon index.

253

### 254 *Differential abundance of key taxa and correlations*

255 Overlapping sets of ASVs had significant differences in relative abundance between each type of adult  
256 female, and this allowed us to identify the potential source of each bacterial associate (Fig. 4; Table S1).  
257 ASVs that were significantly more abundant in the hindguts of nesting females than either newly-emerged  
258 or lab-reared females were likely primarily acquired from the external environment. Two ASVs met these  
259 criteria: one from the genus *Pseudomonas* and one classified as *Lactobacillus micheneri*. ASVs that were  
260 significantly less abundant in lab-reared females than in either newly-emerged or nesting females were  
261 likely acquired and maintained by contact with the nest environment. (Both newly-emerged and lab-  
262 reared females were exposed to the nest at emergence, but the lab-reared females could have lost these  
263 bacteria while kept in the lab for 10 d.) These included two ASVs from the family Enterobacteriaceae.  
264 We also identified ASVs for which relative abundance changed with age. Two ASVs had significantly  
265 higher relative abundance in newly-emerged females than both lab-reared or nesting females. These  
266 ASVs decreased in relative abundance with age and were classified as *Pseudomonas* and *Acinetobacter*.  
267 One ASV from the family Intrasporangiaceae increased in relative abundance with age (i.e., was  
268 significantly higher in relative abundance in lab-reared and nesting females than in newly-emerged  
269 females). We identified one ASV from the phylum Chloroflexi (soil bacteria Family JG30-KF-CM45<sup>80</sup>)  
270 that was likely associated with the lab environment, as it had significantly higher relative abundance in  
271 lab-reared females than in newly-emerged or nesting females. This pattern may have been driven by a  
272 single lab-reared female for which Chloroflexi dominated the gut microbiome (Fig. 2b). When this  
273 analysis was repeated with rarefied data, only *L. micheneri* was significantly more abundant in nesting  
274 females than in both lab-reared and newly-emerged females. No other taxa were significantly different

275 between any groups of adult females. Correlation analysis failed to detect any ASVs that were  
 276 significantly associated with Dufour's gland length, maximum terminal oocyte length, or maximum stage  
 277 of oogenesis (BH-adjusted  $p > 0.05$ ).

278

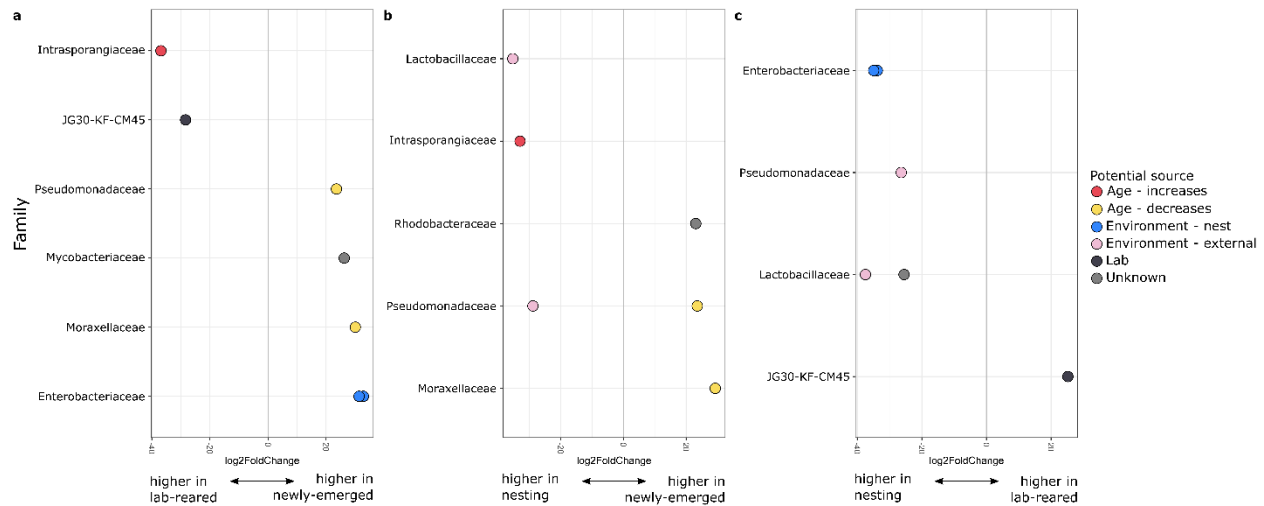

279

280 **Fig. 4.** Differential abundance among adult females indicates potential sources of acquisition. Log<sub>2</sub> fold  
 281 change in hindgut relative abundance between (a) lab-reared and newly-emerged females, (b) nesting and  
 282 newly-emerged females, and (c) nesting and lab-reared females. Filled circles represent a single ASV, with  
 283 family membership indicated on the y-axis and color indicating potential source of acquisition.

284

### 285 *Lactobacillus micheneri*

286 We further investigated the diversity and distribution of *Lactobacillus micheneri* among our sample types  
 287 due to recent interest in how lactic acid bacteria are acquired in wild bees<sup>32,33,40</sup>. We detected 10 ASVs  
 288 that were taxonomically classified as *L. micheneri*. *L. micheneri* has since been described as three distinct  
 289 species – *L. micheneri*, *L. quenuiae*, and *L. timberlakei*<sup>81</sup>. It is therefore likely that many of these strains  
 290 are actually different species. Indeed, the phylogenetic relationship of these ASVs reveals three main  
 291 clades (Fig. 5). Many of these were specific to one or two sample types and at relatively low abundance  
 292 (Table S2). One ASV was found in every type of sample, with the exception of brood cell walls. This was  
 293 the only strain of *L. micheneri* that was detected in lab-reared females, and it was detected in all 14 of the  
 294 pollen provision samples. *L. micheneri* was not detected in any of the brood cell wall samples, and was  
 295 only detected in one of the six lab-reared female samples. *L. micheneri* diversity was highest among

296 feeding larvae, as seven of the 10 ASVs were detected in small larvae. Six of the 10 ASVs were detected  
 297 in the hindgut of nesting females. *L. micheneri* was relatively rare among newly-emerged females, with  
 298 only three ASVs detected in one or two samples each.

299

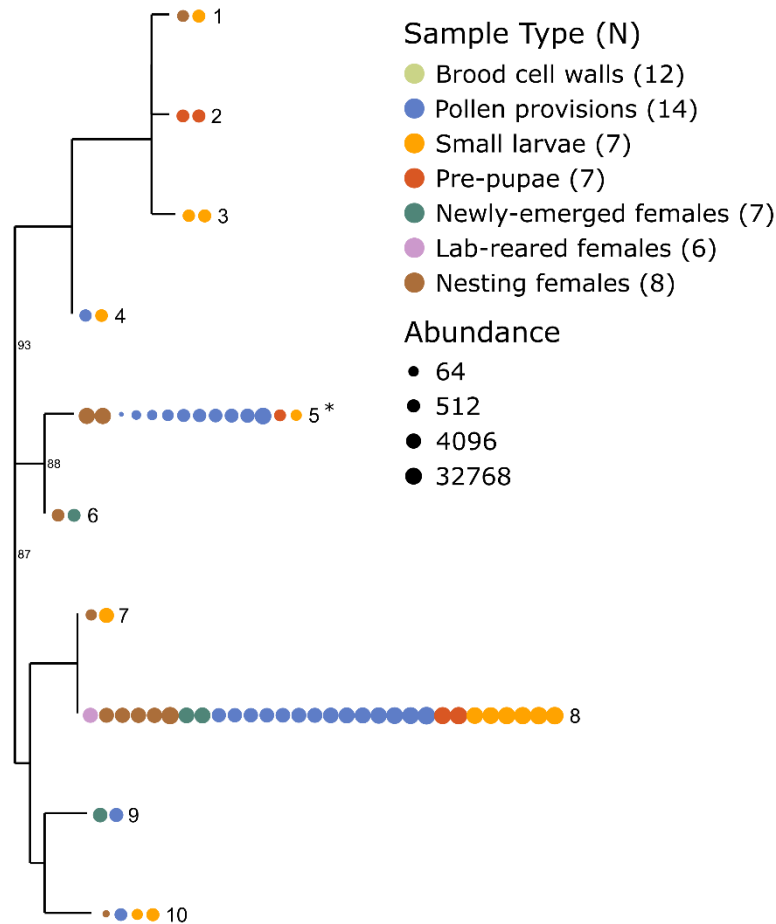

300

301

302 **Fig. 5** Diversity of *Lactobacillus micheneri* in alkali bees. Phylogenetic relationship of ASVs classified as *L.*  
 303 *micheneri* with bootstrap support values near the nodes. Each circle represents an individual sample. Color  
 304 indicates sample type and size reflects abundance on a log<sub>2</sub> scale. Tip label identifies the ASV in Table S2.  
 305 \* signifies *Lactobacillaceae* identified as externally sourced in Fig. 4b,c. Numbers next to sample type  
 306 indicate sample size (N).

307

## 308 DISCUSSION

309 We characterized the composition and diversity of the alkali bee microbiome across its life cycle and  
 310 experimentally investigated potential sources of key bacteria among adult females. Although this is the

311 first description of the microbiome in a solitary ground-nesting bee, we find the most prevalent taxa are  
312 similar to those common in the microbiomes of other bees (e.g., Proteobacteria, Firmicutes)<sup>82</sup>. Our study  
313 shows that community composition of bacterial associates changes throughout the life cycle of alkali  
314 bees, as there were significant differences in the overall microbiome of feeding larvae, pre-pupae, newly-  
315 emerged, and nesting females. Comparisons of intra-group dispersion suggest most of these differences  
316 are not heavily influenced by differences in heterogeneity among our sample types. Moreover, we  
317 collected all samples at the same locations at the same time of year. Thus, overall differences in  
318 composition are not likely driven by seasonal or environmental fluctuations. Examination of microbial  
319 composition and diversity allowed us to make inferences about the factors that shape the microbial  
320 communities associated with alkali bees.

321

322 One of the clearest findings of our study is that the alkali bee microbiome is heavily influenced by feeding  
323 status. The community composition of bacteria found in the feeding larvae is highly similar to that of the  
324 pollen provisions collected from brood cells. This may reflect the fact that we sampled from the posterior  
325 (gut) end of the larvae, which was likely filled with recently consumed pollen. The hindguts of nesting  
326 females harbored a bacterial community that was also quite similar to that of feeding larvae and pollen  
327 provisions. (Adonis analysis revealed a statistically different community composition, but nesting females  
328 clustered with pollen provisions and small larvae on axis 1 of the PCoA plot.) Adult alkali bees regularly  
329 consume nectar and pollen<sup>83</sup>, so it is perhaps unsurprising that their gut microbiomes would be similar to  
330 those of brood provisions and feeding larvae. Yet, the significant difference in overall composition  
331 reveals there are likely to be unique resident bacteria living in the hindguts of adult female alkali bees.  
332 Nesting females have a relatively higher proportion of Proteobacteria from the family Enterobacteriaceae  
333 than small larvae and pollen provisions, which tend to be dominated by Firmicutes. Other members of the  
334 Enterobacteriaceae family found in honey bee guts (*Gilliamella apicola* and *Frischella perrara*) aide in  
335 digestion and immunity<sup>12,84</sup>, but it is unknown if the bacteria detected in alkali bees play similar roles.

336

337 Non-feeding larvae (pre-pupae) are more influenced by their environmental surroundings. Evidence for  
338 this is that the microbiome composition of pre-pupae and newly-emerged adult female hindguts were not  
339 significantly different. The primary source of contact for both pre-pupae and newly-emerged adults is the  
340 nest. Indeed, both of these sample types clustered with brood cell walls on axis 1 of the PCoA (Fig. 2A).  
341 This could reflect the fact that their guts are empty. Larvae typically expel meconium after they have  
342 finished consuming their pollen provisions and do not eat again until after they complete development  
343 and emerge from their natal nest. While it is known that honey bees acquire their microbiome from the  
344 hive environment<sup>68</sup>, the external environment is thought to play a larger role in determining the solitary  
345 bee microbiome<sup>32,33,85</sup>. Our results indicate that this is specific to development stage, particularly with  
346 regard to feeding.

347  
348 Patterns of diversity allow inferences about the functional role of the microbiome across the alkali bee  
349 lifecycle. For example, pollen provisions and small larvae had the lowest beta diversity of any group. This  
350 indicates that the brood provisions of alkali bees are highly uniform, which could suggest the microbiome  
351 has a functional role in preventing spoilage, digestion, or other processes important to the early stages of  
352 bee development. This is consistent with the high prevalence of *Lactobacillus* (primarily *L. micheneri*) in  
353 the pollen provisions and small larvae. *Lactobacillus* are commonly found in pollen provisions and larvae  
354 of other wild bees<sup>32,33,35</sup>. In honey bees, a diverse flora of *Lactobacillus* play a role in activating the  
355 immune response<sup>5</sup>, inhibiting pathogens<sup>21</sup>, and preventing spoilage in stored pollen<sup>86</sup>. Genomic analyses  
356 suggest bacteria in the *L. micheneri* clade may be capable of inhibiting spoilage-causing pathogens and  
357 aiding in digestion and detoxification of pollen<sup>87</sup>. This suggests that the uniformity of a *Lactobacillus*-  
358 based microbiome in alkali bee pollen provisions and small larvae is an adaptation that ensures optimal  
359 nutrition for developing alkali bees.

360  
361 Our study also provides some insight as to how alkali bees acquire their bacterial associates. Newly-  
362 emerged and lab-reared females had statistically similar communities of bacteria in their hindguts. Yet the



363 hindgut microbiome of nesting females was statistically different in overall composition from either  
364 newly-emerged females or lab-reared females. This suggests that the microbiome is substantially  
365 influenced by bacteria acquired from the environment, as has been suggested for other wild bees<sup>40</sup>.  
366 Additional analyses revealed that at least two ASVs are significantly more abundant in nesting females  
367 than in newly-emerged and lab-reared females. This suggests they are likely acquired from the external  
368 (potentially floral) environment. Bacteria in the *L. micheneri* clade are commonly transmitted between  
369 flowers and wild adult bees<sup>32,33,40</sup>. One ASV classified as *L. micheneri* (tip 5 in Fig. 5) was not detected at  
370 all in newly-emerged or lab-reared females. It also was not detected in brood cell walls and only at low  
371 levels in small larvae and pre-pupae. It was, however, detected in relatively high abundance in nesting  
372 females and pollen provisions. This suggests this bacterium is common on flowers, and that nesting  
373 females are frequently re-inoculated as they forage.

374

## 375 CONCLUSION

376 Our study provides the first description of a solitary, ground-nesting bee, which also happens to be a  
377 native pollinator of economic import in the western U.S.A. Alkali bees occupy the ecological niche most  
378 common to bees across the globe. Understanding the patterns of microbiome diversity and acquisition in  
379 this species may provide insights about the relationship between bees and their bacterial associates that  
380 apply to other species. These insights include the following: (1) Composition of the microbiome changes  
381 over the course of development, and is largely influenced by food intake. (2) The bacterial make-up of  
382 pollen provisions (and thus feeding larvae) is highly uniform and largely comprised of *L. micheneri*,  
383 suggesting a functional role in early development. (3) The gut microbiome of nesting females is largely  
384 acquired after completion of development, and the external environment is likely to be an important  
385 source in this process.

386

387 **DATA AVAILABILITY**

388 All raw sequence data have been deposited in the NCBI SRA (BioProject PRJNA675403). Code and data  
389 are available at <https://github.com/kapheimlab>.

390

391 **REFERENCES**

- 392 1. Dharampal, P. S., Hetherington, M. C. & Steffan, S. A. Microbes make the meal: oligolectic bees  
393 require microbes within their host pollen to thrive. *Ecol. Entomol.* een.12926 (2020).  
394 doi:10.1111/een.12926
- 395 2. Sonnenburg, J. L. & Bäckhed, F. Diet-microbiota interactions as moderators of human  
396 metabolism. *Nature* **535**, 56–64 (2016).
- 397 3. Suzuki, T. A. Links between natural variation in the microbiome and host fitness in wild  
398 mammals. *Integr. Comp. Biol.* **57**, 756–769 (2017).
- 399 4. Zheng, D., Liwinski, T. & Elinav, E. Interaction between microbiota and immunity in health and  
400 disease. *Cell Research* **30**, 492–506 (2020).
- 401 5. Kwong, W. K., Mancenido, A. L. & Moran, N. A. Immune system stimulation by the native gut  
402 microbiota of honey bees. *R. Soc. Open Sci.* **4**, 170003 (2017).
- 403 6. Bo, T.-B. *et al.* Coprophagy prevention alters microbiome, metabolism, neurochemistry, and  
404 cognitive behavior in a small mammal. *ISME J.* 1–21 (2020). doi:10.1038/s41396-020-0711-6
- 405 7. Sarkar, A. *et al.* The role of the microbiome in the neurobiology of social behaviour. *Biol. Rev.* **95**,  
406 brv.12603 (2020).
- 407 8. Vernier, C. L. *et al.* The gut microbiome defines social group membership in honey bee colonies.  
408 *Sci. Adv.* **6**, eabd3431 (2020).
- 409 9. Lemoine, M. M., Engl, T. & Kaltenpoth, M. Microbial symbionts expanding or constraining  
410 abiotic niche space in insects. *Current Opinion in Insect Science* **39**, 14–20 (2020).
- 411 10. Engel, P. *et al.* The Bee Microbiome: Impact on Bee Health and Model for Evolution and Ecology  
412 of Host-Microbe Interactions. *MBio* **7**, (2016).

- 413 11. Daisley, B. A., Chmiel, J. A., Pitek, A. P., Thompson, G. J. & Reid, G. Missing microbes in bees:  
414 how systematic depletion of key symbionts erodes immunity. *Trends in Microbiology* (2020).  
415 doi:10.1016/j.tim.2020.06.006
- 416 12. Bonilla-Rosso, G. & Engel, P. Functional roles and metabolic niches in the honey bee gut  
417 microbiota. *Current Opinion in Microbiology* **43**, 69–76 (2018).
- 418 13. Zheng, H., Powell, J. E., Steele, M. I., Dietrich, C. & Moran, N. A. Honeybee gut microbiota  
419 promotes host weight gain via bacterial metabolism and hormonal signaling. *Proc. Natl. Acad. Sci.*  
420 **114**, 4775–4780 (2017).
- 421 14. Zheng, H. *et al.* Metabolism of toxic sugars by strains of the bee gut symbiont *Gilliamella apicola*.  
422 *MBio* **7**, (2016).
- 423 15. Engel, P. & Moran, N. A. Functional and evolutionary insights into the simple yet specific gut  
424 microbiota of the honey bee from metagenomic analysis. *Gut Microbes* **4**, 60–65 (2013).
- 425 16. Lee, F. J., Rusch, D. B., Stewart, F. J., Mattila, H. R. & Newton, I. L. G. Saccharide breakdown  
426 and fermentation by the honey bee gut microbiome. *Environ. Microbiol.* **17**, 796–815 (2015).
- 427 17. Anderson, K. E. *et al.* Hive-stored pollen of honey bees: Many lines of evidence are consistent  
428 with pollen preservation, not nutrient conversion. *Mol. Ecol.* **23**, 5904–5917 (2014).
- 429 18. Rothman, J. A., Leger, L., Graystock, P., Russell, K. & McFrederick, Q. S. The bumble bee  
430 microbiome increases survival of bees exposed to selenate toxicity. *Environ. Microbiol.* 1462-  
431 2920.14641 (2019). doi:10.1111/1462-2920.14641
- 432 19. Wu, Y. *et al.* Honey bee (*Apis mellifera*) gut microbiota promotes host endogenous detoxification  
433 capability via regulation of P450 gene expression in the digestive tract. *Microb. Biotechnol.* **13**,  
434 1201–1212 (2020).
- 435 20. Praet, J. *et al.* Large-scale cultivation of the bumblebee gut microbiota reveals an underestimated  
436 bacterial species diversity capable of pathogen inhibition. *Environ. Microbiol.* **20**, 214–227  
437 (2018).
- 438 21. Forsgren, E., Olofsson, T. C., Vásquez, A. & Fries, I. Novel lactic acid bacteria inhibiting

- 439 *Paenibacillus larvae* in honey bee larvae. *Apidologie* **41**, 99–108 (2010).
- 440 22. Cariveau, D. P., Elijah Powell, J., Koch, H., Winfree, R. & Moran, N. A. Variation in gut  
441 microbial communities and its association with pathogen infection in wild bumble bees (*Bombus*).  
442 *ISME J.* **8**, 2369–2379 (2014).
- 443 23. Raymann, K., Shaffer, Z. & Moran, N. A. Antibiotic exposure perturbs the gut microbiota and  
444 elevates mortality in honeybees. *PLOS Biol.* **15**, e2001861 (2017).
- 445 24. Schwarz, R. S., Moran, N. A. & Evans, J. D. Early gut colonizers shape parasite susceptibility and  
446 microbiota composition in honey bee workers. *Proc. Natl. Acad. Sci.* **113**, 9345–9350 (2016).
- 447 25. Maes, P. W., A.P.Rodrigues, P., Oliver, R., Mott, B. M. & Anderson, K. E. Diet related gut  
448 bacterial dysbiosis correlates with impaired development, increased mortality and *Nosema* disease  
449 in the honey bee (*Apis mellifera*). *Mol. Ecol.* **25**, 5439–5450 (2016).
- 450 26. Koch, H. & Schmid-Hempel, P. Socially transmitted gut microbiota protect bumble bees against  
451 an intestinal parasite. *Proc. Natl. Acad. Sci.* **108**, 19288–19292 (2011).
- 452 27. Evans, J. D. & Lopez, D. L. Bacterial probiotics induce an immune response in the honey bee  
453 (Hymenoptera: Apidae). *J. Econ. Entomol.* **97**, 752–756 (2004).
- 454 28. Emery, O., Schmidt, K. & Engel, P. Immune system stimulation by the gut symbiont *Frischella*  
455 *perrara* in the honey bee (*Apis mellifera*). *Mol. Ecol.* **26**, 2576–2590 (2017).
- 456 29. Engel, P., Martinson, V. G. & Moran, N. A. Functional diversity within the simple gut microbiota  
457 of the honey bee. *Proc. Natl. Acad. Sci.* **109**, 11002–11007 (2012).
- 458 30. Kwong, W. K. & Moran, N. A. Gut microbial communities of social bees. *Nat Rev Micro* **14**, 374–  
459 384 (2016).
- 460 31. McFrederick, Q. S. & Rehan, S. M. Characterization of pollen and bacterial community  
461 composition in brood provisions of a small carpenter bee. *Mol. Ecol.* **25**, 2302–2311 (2016).
- 462 32. McFrederick, Q. S. *et al.* Flowers and wild megachilid bees share microbes. *Microb. Ecol.* **73**,  
463 188–200 (2017).
- 464 33. McFrederick, Q. S. *et al.* Environment or kin: whence do bees obtain acidophilic bacteria? *Mol.*

- 465 *Ecol.* **21**, 1754–1768 (2012).
- 466 34. McFrederick, Q. S., Wcislo, W. T., Hout, M. C. & Mueller, U. G. Host species and developmental  
467 stage, but not host social structure, affects bacterial community structure in socially polymorphic  
468 bees. *FEMS Microbiol. Ecol.* **88**, 398–406 (2014).
- 469 35. Graystock, P., Rehan, S. M. & McFrederick, Q. S. Hunting for healthy microbiomes: determining  
470 the core microbiomes of Ceratina, Megalopta, and Apis bees and how they associate with  
471 microbes in bee collected pollen. *Conserv. Genet.* **18**, 701–711 (2017).
- 472 36. McFrederick, Q. S. *et al.* Specificity between lactobacilli and hymenopteran hosts is the exception  
473 rather than the rule. *Appl. Environ. Microbiol.* **79**, 1803–1812 (2013).
- 474 37. Sanders, J. G. *et al.* Stability and phylogenetic correlation in gut microbiota: Lessons from ants  
475 and apes. *Mol. Ecol.* **23**, 1268–1283 (2014).
- 476 38. Kwong, W. K. *et al.* Dynamic microbiome evolution in social bees. *Sci. Adv.* **3**, 1–17 (2017).
- 477 39. Rothman, J. A., Andrikopoulos, C., Cox-Foster, D. & McFrederick, Q. S. Floral and Foliar Source  
478 Affect the Bee Nest Microbial Community. *Microb. Ecol.* **78**, 506–516 (2019).
- 479 40. Cohen, H., McFrederick, Q. S. & Philpott, S. M. Environment shapes the microbiome of the blue  
480 orchard bee, *Osmia lignaria*. *Microb. Ecol.* **80**, 897–907 (2020).
- 481 41. Muñoz-Colmenero, M. *et al.* Differences in honey bee bacterial diversity and composition in  
482 agricultural and pristine environments – a field study. *Apidologie* 1–20 (2020).  
483 doi:10.1007/s13592-020-00779-w
- 484 42. Kapheim, K. M. *et al.* Caste-specific differences in hindgut microbial communities of honey bees  
485 (*Apis mellifera*). *PLoS One* **10**, 1–14 (2015).
- 486 43. Elijah Powell, J., Eiri, D., Moran, N. A. & Rangel, J. Modulation of the honey bee queen  
487 microbiota: Effects of early social contact. *PLoS One* **13**, 1–14 (2018).
- 488 44. Tarpy, D. R., Mattila, H. R. & Newton, I. L. G. Development of the honey bee gut microbiome  
489 throughout the queen-rearing process. *Appl. Environ. Microbiol.* **81**, 3182–3191 (2015).
- 490 45. Dong, Z. X. *et al.* Colonization of the gut microbiota of honey bee (*Apis mellifera*) workers at

- 491 different developmental stages. *Microbiol. Res.* **231**, 126370 (2020).
- 492 46. D'Alvise, P. *et al.* The impact of winter feed type on intestinal microbiota and parasites in honey  
493 bees. *Apidologie* **49**, 252–264 (2018).
- 494 47. Huang, S. K. *et al.* Influence of feeding type and *Nosema ceranae* infection on the gut microbiota  
495 of *Apis cerana* workers. *mSystems* **3**, 177–195 (2018).
- 496 48. Rothman, J. A., Carroll, M. J., Meikle, W. G., Anderson, K. E. & McFrederick, Q. S. Longitudinal  
497 effects of supplemental forage on the Honey Bee (*Apis mellifera*) microbiota and inter- and intra-  
498 colony variability. *Microb. Ecol.* **76**, 814–824 (2018).
- 499 49. Zhang, Y. *et al.* *Nosema ceranae* infection enhances *Bifidobacterium spp.* abundances in the  
500 honey bee hindgut. *Apidologie* **50**, 353–362 (2019).
- 501 50. Danforth, B. N., Minckley, R. L. & Neff, J. L. *The Solitary Bees*. (Princeton University Press,  
502 2019).
- 503 51. Santos, P. K. F., Arias, M. C. & Kapheim, K. M. Loss of developmental diapause as prerequisite  
504 for social evolution in bees. *Biol. Lett.* **15**, 20190398 (2019).
- 505 52. Harmon-Threatt, A. Influence of nesting characteristics on health of wild bee communities.  
506 *Annual Review of Entomology* **65**, 39–56 (2020).
- 507 53. Johansen, C., Mayer, D., Stanford, A. & Kious, C. *Alkali bees: their biology and management for*  
508 *alfalfa seed production in the Pacific Northwest. Publication, Pacific Northwest Cooperative*  
509 *Extension Service* (1982).
- 510 54. Cane, J. H. A native ground-nesting bee (*Nomia melanderi*) sustainably managed to pollinate  
511 alfalfa across an intensively agricultural landscape. *Apidologie* **39**, 315–323 (2008).
- 512 55. Cane, J. H. Pollinating bees (Hymenoptera: Apiformes) of U.S. alfalfa compared for rates of pod  
513 and seed set. *J. Econ. Entomol.* **95**, 22–27 (2002).
- 514 56. Batra, S. W. & Bohart, G. E. Alkali bees: response of adults to pathogenic fungi in brood cells.  
515 *Science* **165**, 607 (1969).
- 516 57. Galbraith, D. A. *et al.* Investigating the viral ecology of global bee communities with high-

- 517 throughput metagenomics. *Sci. Rep.* **8**, 1–11 (2018).
- 518 58. Bohart, G. E., Stephen, W. P. & Eppley, E. K. The biology of *Heterostylum robustum* (Diptera:  
519 Bombyliidae), a parasite of the alkali bee. *Ann. Entomol. Soc. Am.* **53**, 425–435 pp. (1960).
- 520 59. Johansen, C. A., Mayer, D. F. & Eves, J. D. *Biology and management of the alkali bee, Nomia*  
521 *melanderi* Cockerell (Hymenoptera: Halictidae). *Melanderia* (Washington State Entomology,  
522 1978).
- 523 60. Johansen, C. A. & Mayer, D. F. *Pollinator protection: A bee and pesticide handbook*. (Wicwas  
524 Press, 1990).
- 525 61. Stephen, W. P. Solitary bees in North American agriculture: a perspective. in *For Nonnative*  
526 *Crops, Whence Pollinators of the Future?* (eds. Strickler, K. & Cane, J. H.) 41–66 (Entomol. Soc.  
527 Am., 2003).
- 528 62. Kapheim, K. M. *et al.* Draft genome assembly and population genetics of an agricultural  
529 pollinator, the solitary alkali bee (Halictidae: *Nomia melanderi*). *G3* **9**, 625–634 (2019).
- 530 63. Batra, S. W. T. Aggression, territoriality, mating and nest aggregation of some solitary bees  
531 (Hymenoptera: Halictidae, Megachilidae, Colletidae, Anthophoridae). *J. Kansas Entomol. Soc.* **51**,  
532 547–559 (1978).
- 533 64. Mayer, D. F. & Miliczky, E. R. Emergence, male behavior, and mating in the alkali bee, *Nomia*  
534 *melanderi* Cockerell (Hymenoptera: Halictidae). *J. Kansas Entomol. Soc.* **71**, 61–68 (1998).
- 535 65. Kapheim, K. M. & Johnson, M. M. Juvenile hormone, but not nutrition or social cues, affects  
536 reproductive maturation in solitary alkali bees ( *Nomia melanderi* ). *J. Exp. Biol.* jeb.162255  
537 (2017). doi:10.1242/jeb.162255
- 538 66. Koch, H. & Schmid-Hempel, P. Bacterial communities in central European bumble bees: low  
539 diversity and high specificity. *Microb. Ecol.* **62**, 121–133 (2011).
- 540 67. Martinson, V. G., Moy, J. & Moran, N. A. Establishment of characteristic gut bacteria during  
541 development of the honeybee worker. *Appl. Environ. Microbiol.* **78**, 2830–2840 (2012).
- 542 68. Powell, J. E., Martinson, V. G., Urban-Mead, K. & Moran, N. A. Routes of acquisition of the gut

- 543 microbiota of the honey bee *Apis mellifera*. *Appl. Environ. Microbiol.* **80**, 7378–7387 (2014).
- 544 69. Kapheim, K. M. & Johnson, M. M. Support for the reproductive ground plan hypothesis in a  
545 solitary bee: Links between sucrose response and reproductive status. *Proc. R. Soc. B Biol. Sci.*  
546 **284**, 20162406 (2017).
- 547 70. R Core Team. R: A language and environment for statistical computing. (2019).
- 548 71. McMurdie, P. J. & Holmes, S. phyloseq: An R package for reproducible interactive analysis and  
549 graphics of microbiome census data. *PLoS One* **8**, e61217 (2013).
- 550 72. NM, D., D, P., SP, H., DA, R. & BJ, C. Simple statistical identification and removal of  
551 contaminant sequences in marker-gene and metagenomics data. *bioRxiv* 221499 (2017).  
552 doi:10.1101/221499
- 553 73. Jari Oksanen, F. *et al.* vegan: Community Ecology Package. (2019).
- 554 74. McMurdie, P. J. & Holmes, S. Waste not, want not: why rarefying microbiome data is  
555 inadmissible. *PLoS Comput Biol* **10**, e1003531 (2014).
- 556 75. Anderson, M. J., Ellingsen, K. E. & McArdle, B. H. Multivariate dispersion as a measure of beta  
557 diversity. *Ecol. Lett.* **9**, 683–693 (2006).
- 558 76. Bates, D., Maechler, M., Bolker, B. & Walker, S. Fitting linear mixed-effects models using lme4.  
559 *J. Stat. Softw.* **67**, 1–48 (2015).
- 560 77. Lenth, R. emmeans: estimated marginal means, aka least-squares means. (2020).
- 561 78. Love, M. I., Huber, W. & Anders, S. Moderated estimation of fold change and dispersion for  
562 RNA-seq data with DESeq2. *Genome Biol.* **15**, 550 (2014).
- 563 79. Lahti, L. & Shetty, S. microbiome R package. (2012).
- 564 80. Rummel, P. S. *et al.* Maize root and shoot litter quality controls short-term emissions and bacterial  
565 community structure of arable soil. *Biogeosciences* **17**, 1181–1198 (2020).
- 566 81. McFrederick, Q. S., Vuong, H. Q. & Rothman, J. A. *Lactobacillus micheneri* sp. nov.,  
567 *Lactobacillus timberlakei* sp. nov. and *Lactobacillus quenuiae* sp. nov., lactic acid bacteria  
568 isolated from wild bees and flowers. *Int. J. Syst. Evol. Microbiol.* **68**, 1879–1884 (2018).



- 569 82. Engel, P. & Moran, N. A. The gut microbiota of insects - diversity in structure and function.  
570 *FEMS Microbiology Reviews* **37**, 699–735 (2013).
- 571 83. Cane, J. H., Dobson, H. E. M. & Boyer, B. Timing and size of daily pollen meals eaten by adult  
572 females of a solitary bee (*Nomia melanderi*) (Apiformes: Halictidae). *Apidologie* **48**, 17–30  
573 (2016).
- 574 84. Engel, P., Bartlett, K. D. & Moran, N. A. The bacterium *Frischella perrara* causes scab formation  
575 in the gut of its honeybee host. *MBio* **6**, 1–8 (2015).
- 576 85. Martinson, V. G. *et al.* A simple and distinctive microbiota associated with honey bees and  
577 bumble bees. *Mol. Ecol.* **20**, 619–628 (2011).
- 578 86. Vásquez, A. & Olofsson, T. C. The lactic acid bacteria involved in the production of bee pollen  
579 and bee bread. *J. Apic. Res.* **48**, 189–195 (2009).
- 580 87. Vuong, H. Q. & McFrederick, Q. S. Comparative genomics of wild bee and flower isolated  
581 *Lactobacillus* reveals potential adaptation to the bee host. *Genome Biol. Evol.* **11**, 2151–2161  
582 (2019).

583

#### 584 **ACKNOWLEDGEMENTS**

585 We are grateful to Craig Huntzinger and Diana Cox-Foster who assisted with pollen sterilization. Emily  
586 Thomas assisted with DNA extractions. We thank John Dodd and Forage Genetics International for  
587 providing lab space and logistical support in Touchet, WA, USA. We thank Mike Ingham, Mark  
588 Wagoner, and Mike Buckley for access to their bee beds and bees. F. Dowsett provided valuable  
589 assistance in the field. F. K. Hunter and M. A. Hagadorn provided valuable feedback on an earlier version  
590 of this manuscript. Funding was provided by the USDA-ARS Alfalfa Pollinator Research Initiative and  
591 Utah Agricultural Experiment Station (Project 1297).

592

593 **AUTHOR CONTRIBUTIONS**

594 KMK designed the experiment, performed the experiment, analyzed the data, and wrote the paper. MMJ  
595 and MJ performed the experiment, edited the paper, and approved the final manuscript. MMJ performed  
596 dissections and DNA extractions.

597

598 **ADDITIONAL INFORMATION**

599 The author(s) declare no competing interests.
